# Supplementary material for: Socioeconomic deprivation and provision of acute and long-term care after stroke: the South London Stroke Register cohort study
Source: HighWire-hosted journal article supplement (doi:10.1136/jnnp-2013-306413), 2014-04-13
Supplement: jnnp-2013-306413supp_table.pdf [file jnnp-2013-306413supp_table.pdf]

**Online Table 1. Proportion of patients eligible for and receiving intervention for acute stroke in SLSR of 2005-2010<sup>¥§</sup>**

**Values are number receiving intervention/number eligible for intervention (%) unless stated otherwise**

| Variable                                                | Socioeconomic Deprivation<br>(Carstairs score – quintile) |      |                                    |      | P value |
|---------------------------------------------------------|-----------------------------------------------------------|------|------------------------------------|------|---------|
|                                                         | Deprived (2 <sup>nd</sup> -5 <sup>th</sup> Q)             |      | Least deprived (1 <sup>st</sup> Q) |      |         |
|                                                         | N=946                                                     |      | N=244                              |      |         |
|                                                         | n                                                         | %    | n                                  | %    |         |
| No with ischaemic stroke                                | 818                                                       |      | 192                                |      |         |
| Thrombolysis                                            | 98/783                                                    | 12.5 | 23/189                             | 12.2 | 0.897   |
| Aspirin started at any time in acute phase <sup>†</sup> | 635/746                                                   | 85.1 | 151/172                            | 87.8 | 0.368   |
| Aspirin started by 48 hours after stroke                | 472/523                                                   | 90.3 | 112/124                            | 90.3 | 0.980   |
| No with failed swallow screen <sup>‡</sup>              | 288                                                       |      | 69                                 |      |         |
| Fed by enteral route <sup>‡</sup>                       | 149/280                                                   | 53.2 | 36/68                              | 52.9 | 0.968   |
| Intravenous fluids *                                    | 521/954                                                   | 54.5 | 125/223                            | 56.1 | 0.674   |
| No requiring physiotherapy or occupational therapy *    | 796                                                       |      | 183                                |      |         |
| Physiotherapy or occupational therapy received, n(%)    | 640/764                                                   | 83.8 | 154/176                            | 87.5 | 0.218   |
| No requiring speech and language therapy, *n(%)         | 666                                                       |      | 163                                |      |         |
| Speech and language therapy received                    | 423/625                                                   | 67.7 | 108/156                            | 69.2 | 0.710   |

<sup>¥</sup>data available from 2005. <sup>§</sup>All data analysis excluding patients with SAH. <sup>†</sup>within first seven days of stroke. <sup>‡</sup> Nasogastric or percutaneous endoscopic gastrostomy. \*Analysis limited to patients admitted to hospital.
